# Supplementary material for: Single electron tunneling in large scale nanojunction arrays with bisferrocene–nanoparticle hybrids
Source: Royal Society of Chemistry journal article supplement (doi:10.1039/c2nr11195k), 2012-01-01
Supplement: c2nr11195k.pdf [file c2nr11195k.pdf]

**Electronic Supplementary Information**

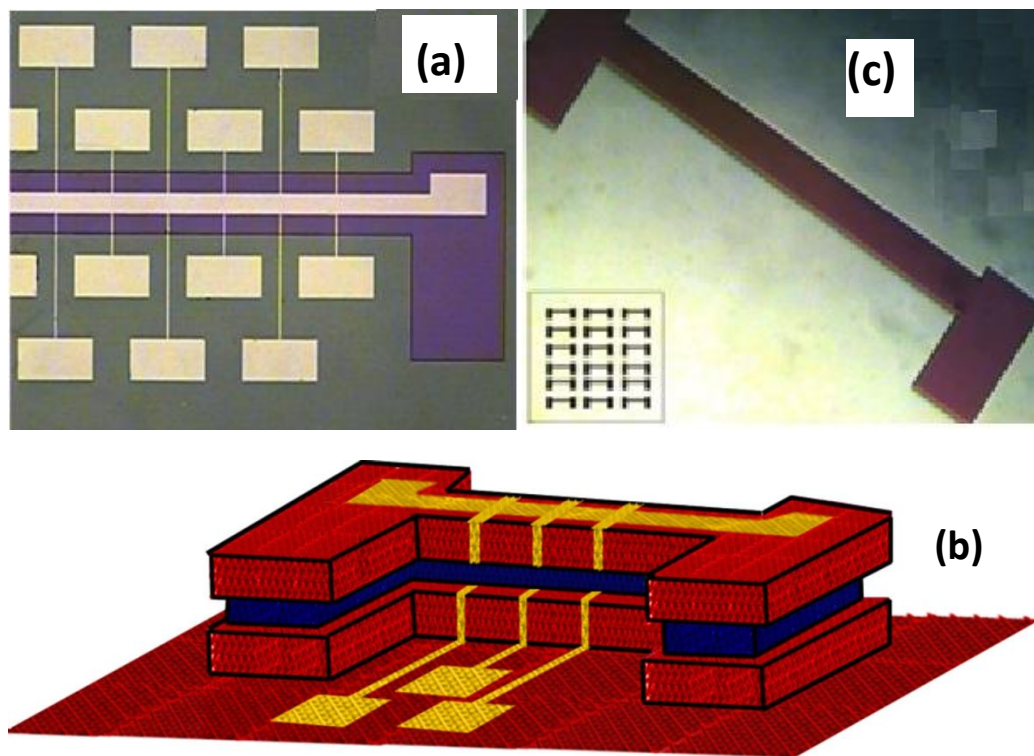

**Figure S1** (a) Optical microscope image of an array of mesa nanojunctions and (b) Three dimensional schematic presentation of an array consisting of few nanojunctions. (c) Optical microscope image of a single mesa structure just after nanogap formation, inset shows the mask pattern.
